# Supplementary material
Source: MDPI journal article supplement (https://www.mdpi.com/2079-9276/13/1/5)
Supplement: s1 [file s1]

**Table S1.** Representative processes in eco invent v3.8.

| Process in concentrated latex manufacture             | Representative process in eco invent v3.8                                                                                                                                                                                                                                                                                   |
|-------------------------------------------------------|-----------------------------------------------------------------------------------------------------------------------------------------------------------------------------------------------------------------------------------------------------------------------------------------------------------------------------|
| Diammonium phosphate or Diammonium hydrogen phosphate | Diammonium phosphate {RoW}   market for diammonium phosphate   APOS, U                                                                                                                                                                                                                                                      |
| Zinc oxide                                            | Zinc oxide {GLO}   market for   APOS, U                                                                                                                                                                                                                                                                                     |
| Ammonia                                               | Ammonia, anhydrous, liquid {RoW}   market for ammonia, anhydrous, liquid   APOS, U                                                                                                                                                                                                                                          |
| Sulfuric acid                                         | Sulfuric acid {RoW}   market for sulfuric acid   APOS, U                                                                                                                                                                                                                                                                    |
| Lauric acid                                           | Fatty acid {GLO}   market for   APOS, U                                                                                                                                                                                                                                                                                     |
| Water supply                                          | Water pump operation, electric {RoW}   water pump operation, electric   APOS, U<br>Converted the amount of water supplied (in kg) to energy by multiplying energy consumption per 1 kg of water (from our previous publications [1,2]) by the water amount consumed in each factory.                                        |
| Electricity                                           | Electricity, medium voltage {LK}   market for electricity, medium voltage   APOS, U                                                                                                                                                                                                                                         |
| Wastewater treatment                                  | Wastewater, average {RoW}   treatment of, capacity 1.1E10l/year   APOS, U                                                                                                                                                                                                                                                   |
| Transportation of latex                               | Transport, freight, lorry 3.5-7.5 metric ton, euro3 {RoW}   market for transport, freight, lorry 3.5-7.5 metric ton, EURO3   APOS, U                                                                                                                                                                                        |
| Inverter Installation                                 | Electronics, for control units {GLO}   market for   APOS, U (this dataset is based on 1 kg of control unit; the weight of 8kg inverter unit was considered for embodied emission calculations after consulting electricity superintendent from Ceylon Electricity Board)                                                    |
| Solar panel installation                              | Photovoltaic flat-roof installation, 3kWp, multi-Si, on roof {GLO}   market for   APOS, U (This dataset caters to a 3kWp system; hence we calculated the embodied emissions (x) of the solar system of each factory (a) proportional to its and dataset's capacity (3), i.e. $x = \text{data set emissions} / 3 \times a$ ) |

**Table S2.** Emission inventory of some selected pollutants per 1 tonne of concentrated latex. ZnO, and DAHP refer to Tetramethyl thiuram disulfide, Zinc oxide.

| Environmental impact/pollutants         | Unit | Total  | DAHP  | ZnO  | Ammonia | Sulfuric acid | Lauric acid | Transportation | Water | Electricity | Wastewater treatment |
|-----------------------------------------|------|--------|-------|------|---------|---------------|-------------|----------------|-------|-------------|----------------------|
| <i>Abiotic depletion</i>                |      |        |       |      |         |               |             |                |       |             |                      |
| Tellurium                               | mg   | 62.12  | 12.44 | 0.12 | 1.40    | 37.65         | 0.23        | 7.67           | 0.20  | 1.45        | 0.96                 |
| Silver                                  | mg   | 215.04 | 32.31 | 0.29 | 2.87    | 99.88         | 0.74        | 75.40          | 0.19  | 1.84        | 1.51                 |
| Copper                                  | g    | 181.76 | 35.77 | 0.36 | 6.01    | 105.80        | 0.74        | 24.93          | 0.62  | 4.46        | 3.08                 |
| Gold                                    | mg   | 4.50   | 0.62  | 0.02 | 0.26    | 1.04          | 0.04        | 2.42           | 0.00  | 0.04        | 0.06                 |
| Lead                                    | g    | 35.48  | 6.11  | 0.03 | 0.25    | 19.97         | 0.15        | 8.43           | 0.01  | 0.25        | 0.28                 |
| Zinc                                    | g    | 159.82 | 27.85 | 0.13 | 1.13    | 90.89         | 0.70        | 36.67          | 0.06  | 1.12        | 1.27                 |
| <i>Abiotic depletion (fossil fuels)</i> |      |        |       |      |         |               |             |                |       |             |                      |
| Oil, crude                              | kg   | 42.57  | 0.50  | 0.01 | 0.30    | 0.41          | 0.06        | 33.80          | 0.02  | 7.18        | 0.28                 |
| Coal, hard                              | kg   | 35.04  | 1.35  | 0.05 | 4.47    | 0.58          | 0.11        | 8.99           | 0.08  | 18.66       | 0.76                 |
| Gas, natural                            | m3   | 10.89  | 1.66  | 0.07 | 4.20    | 0.71          | 0.06        | 3.42           | 0.09  | 0.39        | 0.28                 |
| <i>Global warming (GWP100a)</i>         |      |        |       |      |         |               |             |                |       |             |                      |
| CO2                                     | kg   | 218.41 | 7.84  | 0.29 | 19.57   | 2.93          | 3.50        | 119.53         | 0.46  | 60.82       | 3.47                 |
| CH4                                     | g    | 219.90 | 18.50 | 0.81 | 48.04   | 7.76          | 1.24        | 109.88         | 0.84  | 25.68       | 7.16                 |
| N2O                                     | g    | 6.69   | 0.18  | 0.01 | 0.18    | 0.17          | 0.96        | 1.68           | 0.02  | 2.35        | 1.14                 |
| <i>Ozone layer depletion</i>            |      |        |       |      |         |               |             |                |       |             |                      |
| Halon 1301                              | mg   | 2.09   | 0.03  | 0.00 | 0.02    | 0.02          | 0.00        | 1.65           | 0.00  | 0.35        | 0.01                 |
| Halon 1211                              | g    | 115.43 | 38.50 | 2.13 | 27.89   | 3.43          | 2.09        | 33.41          | 1.58  | 2.19        | 4.21                 |
| CFC-10                                  | g    | 312.76 | 24.61 | 0.74 | 7.49    | 40.54         | 9.02        | 111.85         | 0.59  | 30.38       | 87.54                |
| HCFC-22                                 | mg   | 2.89   | 0.20  | 0.01 | 0.18    | 0.06          | 0.02        | 2.09           | 0.01  | 0.11        | 0.21                 |

|                                |    |            |       |      |       |            |       |            |      |            |            |
|--------------------------------|----|------------|-------|------|-------|------------|-------|------------|------|------------|------------|
| <i>Human Toxicity</i>          |    |            |       |      |       |            |       |            |      |            |            |
| Thallium                       | mg | 365<br>.81 | 65.10 | 0.78 | 10.53 | 187.9<br>7 | 1.57  | 56.37      | 1.28 | 35.75      | 6.47       |
| Nickel                         | mg | 440<br>.35 | 54.58 | 0.60 | 13.49 | 152.1<br>3 | 1.59  | 112.4<br>5 | 1.07 | 98.86      | 5.58       |
| Nitrogen<br>oxides             | kg | 1.0<br>1   | 0.02  | 0.00 | 0.03  | 0.02       | 0.00  | 0.71       | 0.00 | 0.21       | 0.02       |
| Sulfur<br>dioxide              | g  | 801<br>.35 | 58.48 | 0.71 | 33.71 | 137.1<br>6 | 2.13  | 185.8<br>4 | 1.60 | 364.2<br>3 | 17.50      |
| Ammoni<br>a                    | g  | 12.<br>06  | 1.69  | 0.02 | 0.43  | 1.09       | 1.59  | 2.50       | 0.02 | 0.97       | 3.76       |
| Particula<br>tes, < 2.5<br>um  | g  | 93.<br>14  | 4.90  | 0.20 | 3.22  | 3.63       | 1.90  | 52.49      | 0.79 | 22.21      | 3.79       |
| <i>Photochemical oxidation</i> |    |            |       |      |       |            |       |            |      |            |            |
| SO2                            | g  | 801<br>.35 | 58.48 | 0.71 | 33.71 | 137.1<br>6 | 2.13  | 185.8<br>4 | 1.60 | 364.2<br>3 | 17.50      |
| CO                             | g  | 287<br>.47 | 9.85  | 0.41 | 11.59 | 6.25       | 1.40  | 231.1<br>3 | 0.29 | 16.54      | 10.00      |
| CH4                            | g  | 219<br>.90 | 18.50 | 0.81 | 48.04 | 7.76       | 1.24  | 109.8<br>8 | 0.84 | 25.68      | 7.16       |
| NOx                            | kg | 1.0<br>1   | 0.02  | 0.00 | 0.03  | 0.02       | 0.00  | 0.71       | 0.00 | 0.21       | 0.02       |
| NMVOC                          | g  | 120<br>.96 | 3.35  | 0.15 | 5.14  | 3.06       | 0.38  | 99.06      | 0.14 | 7.63       | 2.06       |
| <i>Acidification</i>           |    |            |       |      |       |            |       |            |      |            |            |
| SO2                            | g  | 726<br>.68 | 58.48 | 0.71 | 33.71 | 137.1<br>6 | 2.13  | 185.8<br>4 | 1.60 | 364.2<br>3 | 17.50      |
| NOx                            | kg | 1.0<br>1   | 0.02  | 0.00 | 0.03  | 0.02       | 0.00  | 0.71       | 0.00 | 0.21       | 0.02       |
| NH3                            | g  | 12.<br>06  | 1.69  | 0.02 | 0.43  | 1.09       | 1.59  | 2.50       | 0.02 | 0.97       | 3.76       |
| <i>Eutrophication</i>          |    |            |       |      |       |            |       |            |      |            |            |
| Phosphat<br>e                  | g  | 185<br>.09 | 23.82 | 0.30 | 14.45 | 17.58      | 0.57  | 36.98      | 0.93 | 57.37      | 33.09      |
| Nitrogen<br>oxides             | kg | 1.0<br>1   | 0.02  | 0.00 | 0.03  | 0.02       | 0.00  | 0.71       | 0.00 | 0.21       | 0.02       |
| Nitrate                        | g  | 576<br>.50 | 2.75  | 0.11 | 4.44  | 1.64       | 51.57 | 12.72      | 0.28 | 17.95      | 485.0<br>5 |
| Ammoni<br>um, ion              | g  | 111<br>.69 | 0.13  | 0.00 | 0.12  | 0.13       | 0.08  | 0.73       | 0.00 | 0.14       | 110.3<br>7 |
| COD                            | kg | 1.2<br>8   | 0.02  | 0.00 | 0.02  | 0.02       | 0.01  | 0.44       | 0.00 | 0.40       | 0.36       |

**Table S3.** Impact assessment results per processing 1 tonne of concentrated latex.

| Impact category                  | Unit                  | Diammonium phosphate   | Zinc oxide             | Ammonia                | Sulfuric acid          | Lauric acid            | Water supply           | Electricity            | Waste water treatment  | Transportation of field latex | Total Impact           |
|----------------------------------|-----------------------|------------------------|------------------------|------------------------|------------------------|------------------------|------------------------|------------------------|------------------------|-------------------------------|------------------------|
| Abiotic depletion                | kg Sb eq              | 7.208×10 <sup>-4</sup> | 7.585×10 <sup>-6</sup> | 9.078×10 <sup>-5</sup> | 2.125×10 <sup>-3</sup> | 1.644×10 <sup>-5</sup> | 1.041×10 <sup>-5</sup> | 7.603×10 <sup>-5</sup> | 5.775×10 <sup>-5</sup> | 6.621×10 <sup>-4</sup>        | 3.767×10 <sup>-3</sup> |
| Abiotic depletion (fossil fuels) | MJ                    | 1.054×10 <sup>2</sup>  | 4.235                  | 2.409×10 <sup>2</sup>  | 5.452×10 <sup>1</sup>  | 7.028                  | 6.171                  | 6.696×10 <sup>2</sup>  | 3.821×10 <sup>1</sup>  | 1.755×10 <sup>3</sup>         | 2.818×10 <sup>3</sup>  |
| Global warming (GWP100a)         | kg CO <sub>2</sub> eq | 8.426                  | 3.189×10 <sup>-1</sup> | 2.097×10 <sup>1</sup>  | 3.220                  | 3.804                  | 4.939×10 <sup>1</sup>  | 6.257×10 <sup>1</sup>  | 4.131                  | 1.232×10 <sup>2</sup>         | 2.271×10 <sup>2</sup>  |
| Ozone layer depletion            | kg CFC-11 eq          | 6.570×10 <sup>-7</sup> | 2.639×10 <sup>-8</sup> | 4.414×10 <sup>-7</sup> | 3.015×10 <sup>-7</sup> | 6.031×10 <sup>-8</sup> | 2.687×10 <sup>-8</sup> | 4.341×10 <sup>-6</sup> | 2.441×10 <sup>-7</sup> | 2.027×10 <sup>-5</sup>        | 2.637×10 <sup>-5</sup> |
| Human Toxicity                   | kg 1,4-DB eq          | 2.396×10 <sup>1</sup>  | 4.157×10 <sup>-1</sup> | 7.482                  | 6.067×10 <sup>1</sup>  | 1.031                  | 7.247×10 <sup>1</sup>  | 3.050×10 <sup>1</sup>  | 7.946                  | 4.874×10 <sup>1</sup>         | 1.815×10 <sup>2</sup>  |
| Photochemical oxidation          | kg C2H4 eq            | 3.641×10 <sup>-3</sup> | 6.119×10 <sup>-5</sup> | 2.663×10 <sup>-3</sup> | 6.895×10 <sup>-3</sup> | 1.864×10 <sup>-3</sup> | 9.144×10 <sup>-5</sup> | 1.008×10 <sup>-2</sup> | 1.927×10 <sup>-3</sup> | 1.904×10 <sup>-2</sup>        | 5.472×10 <sup>-2</sup> |
| Acidification                    | kg SO <sub>2</sub> eq | 8.455×10 <sup>-2</sup> | 1.257×10 <sup>-3</sup> | 5.460×10 <sup>-2</sup> | 1.786×10 <sup>-1</sup> | 6.783                  | 2.445×10 <sup>-3</sup> | 5.429×10 <sup>-1</sup> | 3.546×10 <sup>-2</sup> | 5.841×10 <sup>-1</sup>        | 1.491                  |
| Eutrophication                   | kg PO eq              | 2.865×10 <sup>-2</sup> | 4.468×10 <sup>-4</sup> | 1.918×10 <sup>-2</sup> | 2.119×10 <sup>-2</sup> | 7.903                  | 1.117×10 <sup>-3</sup> | 9.63×10 <sup>-2</sup>  | 1.326×10 <sup>-1</sup> | 1.427×10 <sup>-1</sup>        | 4.501×10 <sup>-1</sup> |

## References

1. Dunuwila, P.; Rodrigo, V.H.L.; Goto, N. Improving Financial and Environmental Sustainability in Concentrated Latex Manufacture. *J Clean Prod* **2020**, *255*, 120202, doi:10.1016/j.jclepro.2020.120202.
2. Dunuwila, P. Integration of Process Analysis and Decision-Making Tools for the Sustainability Improvements in Raw Rubber Manufacture, Toyohashi University of Technology: Toyohashi, 2019.
